# Supplementary material for: Inventory of Fatty Acid Desaturases in the Pennate Diatom Phaeodactylum tricornutum
Source: PubMed Central journal article supplement (PMC4377986; doi:10.3390/md13031317), 2015-03-16
Supplement: marinedrugs-13-01317-s001.pdf [file marinedrugs-13-01317-s001.pdf]

# Supplementary Information

## 1. PLASTID Desaturases

The alanine-phenylalanine dipeptide conserved in the ASAFAP motif of heterokont plastid bipartite targeting signal is highlighted in red. Serine residues known to be enriched in the -12/+12 flanking region of the ASAFAP motif are shown in green.

*PAD (Phatdr\_9316)*

MLSTKLFWTSSVLA~~SS~~AVLAFPTSPATRTPRST~~S~~ILKVAVDPTTVTKKEYEDICGVSFDADT  
LEDRLKATNYLYPKHVEVIDDIAP~~I~~AGAMVDEILLETGENAWQPQDYLPDLSQDNWHDSIKE  
VRAMA~~K~~EIPDELLVVLIGDMVTEEALPTYQTLN~~T~~FE~~G~~CD~~D~~PTGTSESPWARWSRGWTSEEN  
RHGDLLNKYLYLGGRCDMRNIEVTIQHLITNGFN~~P~~QARKDPYRGFVYTSFQERATKISHGNVG  
KLARTYGEKNLNKICAKIAGDEGRHEKAYQIFSEEILKRDPDGLIHVFGDMMRGQIVMPAEQ  
MTDGKDPDLYDNFSMVAQKTGVY~~T~~ALDYAEI~~I~~DHLV~~K~~RWDLEHLEGLSPA~~A~~EKEREYLCRL  
PERYRKLATRS~~M~~NKKKKVTEDEDPLKSFGWIYGRMA

*FAD6 (Phatdr\_48423)*

MVRFSTAALFSLSTLTPSCIGAFQLSSPAQLPT~~S~~R~~L~~RRHTNTAPLSAVAVDSGSSDPALVGN  
LPLNNNDNEDKNRRMPMDLKGIALSGLKGQALS~~V~~RAEDFPQAKDLRAVIPKDCFEPDTAK  
SLGYLSVSTMGTILCSVVGANLLSVLDPSNPLTWPLWAAYGAVTGTVAMGLWVLAHECGHG  
AFSKNRSLQDAVGYIIHSIMLV~~P~~YFSWQRSHAVHHQYTNHME~~L~~GETHVPDRADKEGEKSLAL  
RQFMLDSFGKDKGMKAYGGLQSFLHLIVGWPA~~Y~~LLIGATGGPDRGMTNHFYPNPLSTPTQPK  
KELFPGNWKEKVYQSDIGIAAVVGALIAWTVT~~S~~GLAPVMALYGGPLIVINAWLVLYTWLQHT  
DTDVPHFSSDNHNFVKGALHTIDR~~P~~YDKLDPWGIIDFLH~~H~~KIGTTHVAHHFDSTIPHYKAQIAT  
DAIKAKFPEVYLYDPTPI~~P~~QAMWRVAKGCTAVEQ~~R~~GDAWVWKNEGIEDLVEHRQSKLSSE

*PlastidDelta6FAD (Phatdr\_50443)*

MKFLHSALIVLTSASASSAF~~T~~ATNFFCL~~S~~QY~~G~~SSVSGCPEDFIRQWKAAGSTTNRISKKNVA  
YDCDEDANCVIVDACDDEQCR~~T~~SLDVRIHGK~~W~~YDL~~S~~GWRKAHPAGAHWIDWYDGRDATEV  
MDAFHSEKGRAMYKRLPASSTESVAMLETTIAPDSSTQIAFRQLR~~D~~LEKEGW~~W~~KRDMVHE  
FTQLGIWASLVVGA~~A~~VT~~A~~HSAPPLATFLLGLSMTAAGWLGHDFIHG~~V~~DSFTDRLRN~~F~~AGVAA  
GLGPTWWSDKHNKHHALTNEQGV~~D~~E~~D~~IATDPFLFTWAPDPK~~D~~DSPLR~~K~~IQH~~L~~IFWVPFSALF  
ALWRVDTMQVVIEAVENKRVGAKGELYGLLLHYAVLFTVFPVTVWLPAIFLSGLMSALIVTP  
THQSEEMFETYQPDWVTAQFQSTRNAVTTNPFSEWLWGGMQYQLEHHLFPSMPRNRYPALR  
ERLIQFAADNKIPGGYRESGEFEILRMNWNLYKSV~~A~~EADAVPGAPPTRGRLGQQGAIRET  
NSPAAQ~~Q~~EKAKIDQTVAKGNGPALESV

*FAD4 (Phatdr\_41301)*

MILHGKTYTSCYPESSRLCSNVSKAF~~N~~KMSLPRQLAATVCFL~~L~~AAKTSSFSLS~~S~~STRTVHRE  
SGLKPLHMAVIPDPSSSSQGLYSTSLRATALASTETETTASNKEKETKKPSW~~N~~DDGFVFGLEGS  
GLERP~~K~~GRNAQIVVEGDSLETQPFQVA~~A~~SV~~T~~FAAHAGFLVNSFSGMVEASSGNIALTSIHAI~~V~~

LTLVSWVIADFGSGVLHWATDNYGNGKTPVMGGIIAAFQGHHSAPWTIAQRGFCNNVYKLCI  
 PFGIVPMLAINAIAPPDVVFFMATFCVFEIMSQEFHKWSHQLKSETPGWVNWVLQDSGLTIARK  
 PHALHHLAPFEGNYCIISGICNPVLDQSGFFRRLERVVYSLNGIESNAWKLDPALRERTLSGDY  
 KFPKARSSSSKP

*Putative PlastidOmega3FAD (Phatdr\_41570)*

MKLHIAPPLIISAYVFSVSIFHNTVNAFSLRIPSTHRTVFLPQVTLNAKRWMVATGVETNAA  
 VATPENDEIHPRRDWTHDEPPKLSEVKRMLPQEAFHIDTATSLFYFAVDFIAVASTMGFLNSV  
 VSSDIYLSFPIWGKFLAVAPLQILTFAMWCMWCIGHDAGHTTVSKDRRFGALINRVVGEVA  
 HSAICLTPFVPWAKSHLKHMHMGNHLTRDYSHQWFIREERESLHPLIQLSHATRNLQLPILYLV  
 YLLFGVPDGGHVVFYGRMWEQSTAKEKADAAVSIVSLVTAGSLWINMGLANFFVVCMPV  
 WLVSFWLFMVTYLQHHSDDLLYTDETWSFERGAFQTVDRDYGTWINRMSHHMMDGHLV  
 HHLFFTRVPHYRLEEATKSLYAVMAARGQSHLIKTIDTPDFTQEIAKQFDKNWFFVNENQIVRK

## 2. Cytosol/ER Desaturases

*ADS (Phatdr\_28797)*

MDLSSEMLREIPGTLQHYKAGNLNYPMIVYTTIVHTVALVGLCTIPQASAETLLWAFVLW  
 PISGFGITVGVHRLWSHRSYEAALPVRVFLMLCNSIANQGSYHWSRDHRVHHKFSETDADPH  
 NARRGFFFAHMGWLVFKKDPVIEAGREMDFSDLLEDVVALQKMVDPWFALYMCYVMPA  
 QVASYFWGENFWTAFVLVAGGLRYCFVLHCTWLVNAAHLYGDHPYDLTSYPAENPFVSWC  
 AVGEGWHNWHHKYPFDYAASEFGVSSQYNPSKLVIDVLASVGLVWGRKRGTAAWAMGRA  
 RRDRDIAQKGEMPKQPPRPWEVRTVARKIA

*FAD2 (Phatdr\_25769)*

MGKGGQRAVAPKSATSSSTGSATLSQSKEQVWTSSYNPLAKDAPELPTKGQIKAVIPKECFQ  
 RSAFWSTFYLMRDLAMAAFCYGTSSQVLSTDLPQDATLILPWALGWGVYAFWMGTILTGPV  
 VVAHECGHGA YSDSQTENDVVGFIHQALLVPYFAWQYTHAKHHRRTNHLVDGESHPSTA  
 KDNGLGPHNERNNSFYAAWHEAMGDGAFVVFQVWSHLFVWPLYLAGLASTGKLAHEGWW  
 LEERNAIADHFRPSSPMFPAKIRAKIALSSATELAVLAGLLYVGTQVGHLPVLLWYWGPTYTFV  
 NAWLVLYTWLQHTDPSIPHYGEGEWTWVKGALSTIDRDYGIFDFHHTIGSTHVHHLFHEM  
 PWYNAGIATQKVKEFLEPQGLYNYDPTPWYKAMWRIARTCHYVESNEGVQYFKSMENVPLT  
 KDVRSKAA

*ERDelta6FAD (PtD6) (Phatdr\_2948)*

MGKGGDARASKGSTAARKISWQEVKTHASPEDAWIIHSNKVYDVSNWHEHPGGAVIFTH  
 AGDDMTDIFAAFHAPGSQSLMKKFYIGELLPETTGKEPQQIAFEKGYRDLRSKLIMMGFMKSN  
 KWFYVYKCLSNMAIWAACALVFYSDFWVHLASAVMLGTFFQQSGWLAHDFLHHQVFTK  
 RKHGDLGGLFWGNLMQGYSVQWWKNKHNGHHA VPNLHCSSAVAQDGDPDIDTMPLLAWS  
 VQQAQSYRELQADGKDSGLVKFMIRNQS YFYFPILLARLSWLNESFKCAFGLGAASENAAL

ELKAKGLQYPLLEKAGILLHYAWMLTVSSGFGRFSFAYTAFYFLTATASCGFLLAIVFGLGHN  
 GMATYNADARPDFWKLQVTTTRNVTGGHGFPQAFVDWFCGGLQYQVDHHLFPSLPRHNLA  
 KTHALVESFCKEKGWVQYHEADLVDGTMEVLHHLGVSAGEFVVDVFRDGPAM

*ERDelta5FAD1 (PtD5) (Phatdr\_46830)*

MAPDADKLRQRQTTAVAKHNAATISTQERLCSLSSLNGEEVCIDGHIYDLQSFDPGGETIK  
 MFGGNDVTVQYKMIHPYHTEKHLEKMKRVGKVTDFVCEYKFDTFEREIKREVFIVRRGK  
 DFGTLGWFFRAFCYIAIFFYLQYHWVTTGTSWLLAVA YGVSQAMIGMNVQHDANHGATSKR  
 PWVNDMLGLGADFIGGSKWLWQEQHWTHHAYTNHAEMDPDSFGAEPMLLFNDYPLDHPA  
 RTWLHRFQAVFYMPVLAGYWLSAVFNPQILDQQRGALSVGIRLDNAFIHSRRKYAVFWRA  
 VYIAVNVIAPFYTNSGLEWSWRVFGNIMLMGVAESLALAVLFSLSHNFESADRPTAPLKKT  
 GEPVDWFKTQVETSCTYGGFLSGCFTGGLNFQVEHHLFPRMSSAWYPYIAPKVREICAKHGV  
 HYAYYPWIHQNFLSTVRYMHAAGTGANWRQMARENPLTGRA

*ERDelta5FAD2 (Phatdr\_22459)*

MDVSLRNKSLSDVDTLAPNHVCIDGKVFDDLDSFDHPGGDSIHVFGGNDVTVLYKMIHPHHG  
 PNQYAQKMKLVGVIDKYRCEYSFDSDFGKEMKREVFQIVRRGQEFGTVGYFFRAFLYIAFFV  
 AVVYRWTFQTGPSYALAVVFGFLAKALIGLNVQHDANHGAAAPPGRKNVWINDLLGWGADL  
 IGGCKYLWIQKHWHHAYTNHAEKDPDAFAAEPFLIFREYPASHPARQWYHKYQTLFLPIIA  
 GYWLSSVLSLEVAKLQDAGAMSATMKFENNFVARQRKFTVFWRIVHLVILGPPLRQHGLTA  
 TALGQALTVGAAGSLFLGCLFSLSHNFVNAERDPTAILAPPPTSTDGSDNENTTAPVCWYKAQ  
 VETSCTYGGFVSGALTGGLNFQVEHHLFPRMSSAWYPFIAPT VRRVCAKHNVTYTYYPWLW  
 QNMASMMRYLHVTTGGNTDAITKLE

*Putative ERDelat4FAD (Phatdr\_22510)*

MATTPSQSKTLDPLLLWMIHGNYDLHTYVSRHPGGKEAILLGRGRDCTALFESYHPFTS  
 QHRRVLEKHRVTIDTSFCQKQDRK VSKQTVSSSEQASDVFNMLCQRVAHALQSQGVDP  
 DRGATWTRSIYYVFLFAALLASGYAHCTGSLLGSLFGVAGWFIGALGHDGGHFAVSRRAW  
 LNDFSVWGISWLCNPIMWQHHTYAHSFTNEFDHDPDLHHFTTFLRVHRKFQQNCIYRNQA  
 NWVYVFWAYTFVTFGACFWIPWGVLRQTL YGLVDWTDKRPSRTAAFVHFLVTFGLVM  
 VLPFWTHGTWYKACLG VILHMTTSLIFAFFSQINHINELSLDEKVVKLHRSTLDPTVRDSWA  
 VAQVEASNNFCTDSAFWHLFSNGLNLQIEHHLFPGINHCHLHHIAPVVRET CNEYGVRYKSY  
 DSWSDIMRAMLKWLDQLSVGLD

© 2015 by the authors; licensee MDPI, Basel, Switzerland. This article is an open access article distributed under the terms and conditions of the Creative Commons Attribution license (<http://creativecommons.org/licenses/by/4.0/>).
